# Supplementary material for: Dynamics and memory of boundary stresses in discontinuous shear thickening suspensions during oscillatory shear
Source: Royal Society of Chemistry journal article supplement (doi:10.1039/d0sm01917h), 2020-11-30
Supplement: d0sm01917h4.pdf [file d0sm01917h4.pdf]

## Dynamics and memory of boundary stresses in discontinuous shear thickening suspensions during oscillatory shear

Vikram Rathee\*<sup>†</sup>, Daniel L. Blair <sup>‡</sup>, and Jeffrey S. Urbach <sup>§</sup>  
*Department of Physics and Institute for Soft Matter Synthesis and Metrology,  
Georgetown University, Washington, DC 20057*

### Supplementary Material

#### Supplementary Movie Captions

**Supplementary Movie 1:** Spatiotemporal dynamics of high stress events revealed by boundary stress measurements at frequency ( $\omega$ ) = 1 and strain ( $\gamma_o$ ) = 26, for  $\phi = 0.56$ . The total time elapsed is 150s having total 24 cycles. The corresponding snapshots are shown in Figure 4. The movie is played at 15 fps.

**Supplementary Movie 2:** Spatiotemporal dynamics of high stress events revealed by boundary stress measurements at frequency ( $\omega$ ) = 1 and strain ( $\gamma_o$ ) = 50, for  $\phi = 0.56$ . The total time elapsed is 150s having total 24 cycles. The corresponding snapshots are shown in Figure 5. The movie is played at 15 fps.

**Supplementary Movie 3:** Spatiotemporal dynamics of high stress events revealed by boundary stress measurements at frequency ( $\omega$ ) = 10 and strain ( $\gamma_o$ ) = 9, for  $\phi = 0.56$ . The total time elapsed is 90s having total 144 cycles. The corresponding snapshots are shown in Figure 9. The movie is played at 9 fps.

---

\* ratheevikram@gmail.com

<sup>†</sup> Present Address: Okinawa Institute of Science and Technology Graduate University, Okinawa 904-0495, Japan

<sup>‡</sup> dllb76@georgetown.edu

<sup>§</sup> urbachj@georgetown.edu
